# Supplementary material
Source: ML conference proceedings conference paper supplement (https://proceedings.mlr.press/v80/wu18c.html)
Supplement: Supplementary file [file wu18c-supp.pdf]

## A. Supplement to ‘‘A Listwise Approach to Collaborative Ranking’’

### A.1. Proofs in Theory section

*Proof of Theorem 1.* Notice that  $\Pi_{i1}$  is the argument,  $k$ , that minimizes  $Y_{ik}$ , and  $\mathbb{P}\{\Pi_{i1} = k\} = \mathbb{P}\{Y_{ik} \leq \min\{Y_{ij}\}_{j \neq k}\}$ . Furthermore,  $\min\{Y_{ij}\}_{j \neq k}$  is exponential with rate parameter  $\sum_{j \neq k} \phi(X_{ij})$  and is independent of  $Y_{ik}$ . Hence,

$$\begin{aligned} & \mathbb{P}\{Y_{ik} \leq \min\{Y_{ij}\}_{j \neq k}\} \\ &= \int_0^\infty \phi(X_{ik}) e^{-u\phi(X_{ik})} e^{-\sum_{j \neq k} u\phi(X_{ij})} du \\ &= \frac{\phi(X_{ik})}{\sum_j \phi(X_{ij})}. \end{aligned}$$

Furthermore,

$$\begin{aligned} \mathbb{P}\{\Pi_i | \Pi_{i1}\} &= \mathbb{P}\{Y_{\Pi_{i2}} \leq \dots \leq Y_{\Pi_{im}} | Y_{\Pi_{ij}} \geq Y_{\Pi_{i1}}, \forall j\} \\ &= \mathbb{P}\{Y_{\Pi_{i2}} - Y_{\Pi_{i1}} \leq \dots \leq Y_{\Pi_{im}} - Y_{\Pi_{i1}} | Y_{\Pi_{ij}} \geq Y_{\Pi_{i1}}, \forall j\}. \end{aligned}$$

By the memorylessness property, we have that the joint distribution of  $Y_{\Pi_{i2}} - Y_{\Pi_{i1}}, \dots, Y_{\Pi_{im}} - Y_{\Pi_{i1}} | Y_{\Pi_{ij}} \geq Y_{\Pi_{i1}}, \forall j > 1$  is equivalent to the distribution of  $Y_{\Pi_{i2}}, \dots, Y_{\Pi_{im}}$ . Hence, we can apply induction with the previous argument, and the tower property of conditional probability.  $\square$

*Proof of Lemma 1.* By optimality,

$$\frac{1}{n} \sum_{i=1}^n -\log P_{\hat{X}_i}(\Pi_i) \leq \frac{1}{n} \sum_{i=1}^n -\log P_{X_i^*}(\Pi_i).$$

Which is equivalent to

$$\frac{1}{n} \sum_{i=1}^n -\log \frac{P_{X_i^*}(\Pi_i)}{P_{\hat{X}_i}(\Pi_i)} \geq 0.$$

Thus, we can subtract the expectation,

$$\begin{aligned} & \frac{1}{n} \sum_{i=1}^n \mathbb{E} \log \frac{P_{X_i^*}(\Pi_i)}{P_{\hat{X}_i}(\Pi_i)} \\ & \leq -\frac{1}{n} \sum_{i=1}^n \left( \log \frac{P_{X_i^*}(\Pi_i)}{P_{\hat{X}_i}(\Pi_i)} - \mathbb{E} \log \frac{P_{X_i^*}(\Pi_i)}{P_{\hat{X}_i}(\Pi_i)} \right) \end{aligned}$$

where the expectation  $\mathbb{E}$  is with respect to the draw of  $\Pi_i$  conditional on  $X$ .  $\square$

**Lemma 2.** Let  $\pi$  be a permutation vector and  $x$  be a score vector each of length  $m$ . Suppose that  $|\log \phi(x_j)| \leq C$  for all  $j = 1, \dots, m$ . Define the relative loss function,

$$L_{x,x'}(\pi) := \log \frac{P_x(\pi)}{P_{x'}(\pi)}.$$

Consider translating an item in position  $\ell$  to position  $\ell'$  in the permutation  $\pi$ , thus forming  $\pi'$  where  $\pi'_{\ell'} = \pi_\ell$ . Specifically,  $\pi'_k = \pi_k$  if  $k < \min\{\ell, \ell'\}$  or  $k > \max\{\ell, \ell'\}$ ; if  $\ell < \ell'$  then  $\pi'_k = \pi_{k+1}$  for  $k = \ell, \dots, \ell' - 1$ ; if  $\ell' < \ell$  then  $\pi'_k = \pi_{k-1}$  for  $k = \ell' + 1, \dots, \ell$ . The relative loss function has bounded differences in the sense that

$$|L_{x,x'}(\pi) - L_{x,x'}(\pi')| \leq C_0 \|\log \phi(x) - \log \phi(x')\|_\infty,$$

where  $\phi(x)$  is applied elementwise and  $C_0 = 2 + e^{2C} \ln(m+1)$ .

*Proof.* Suppose that  $\ell < \ell'$ , and define the following shorthand,

$$\lambda_j = \phi(x_{\pi_j}), \quad \Lambda_j = \sum_{k=j}^m \lambda_k,$$

and let  $\lambda'_j, \Lambda'_j$  be similarly defined with  $x'$ . Then by replacing the permutation  $\pi$  with  $\pi'$  causes the  $\Lambda_j$  to be replaced with  $\Lambda_j - \lambda_j + \lambda_\ell$  for  $j = \ell + 1, \dots, \ell'$ . Hence,

$$\begin{aligned} & \log Q_x(\pi) - \log Q_x(\pi') \\ &= \sum_{j=\ell+1}^{\ell'} \log(\Lambda_j - \lambda_j + \lambda_\ell) - \log(\Lambda_j) \\ &= \sum_{j=\ell+1}^{\ell'} \log(\Lambda_{j-1} + \lambda_\ell) - \log(\Lambda_j) \\ &= \sum_{j=\ell}^{\ell'-1} \log\left(1 + \frac{\lambda_\ell}{\Lambda_j}\right) + \log \Lambda_\ell - \log \Lambda_{\ell'}. \end{aligned}$$

So we can bound the difference,

$$\begin{aligned} |L_{x,x'}(\pi) - L_{x,x'}(\pi')| &\leq \left| \log \frac{\Lambda_\ell}{\Lambda'_\ell} - \log \frac{\Lambda_{\ell'}}{\Lambda'_{\ell'}} \right| \\ &+ \sum_{j=\ell}^{\ell'-1} \left| \log\left(1 + \frac{\lambda_\ell}{\Lambda_j}\right) - \log\left(1 + \frac{\lambda'_\ell}{\Lambda'_j}\right) \right|. \end{aligned}$$

Suppose that for each  $j$ ,  $|\log \lambda_j - \log \lambda'_j| \leq \delta$  and that  $|\log \lambda_j| \leq C$ . Then we have that

$$\left| \log \frac{\Lambda_\ell}{\Lambda'_\ell} \right| \leq \max_{j \geq \ell} \left| \log \frac{\lambda_j}{\lambda'_j} \right| \leq \delta.$$

The same equation can be made for this term with  $\ell'$ . Let

$$\alpha_j = \max \left\{ \frac{\lambda_\ell}{\Lambda_j}, \frac{\lambda'_\ell}{\Lambda'_j} \right\}.$$

Then we have

$$\begin{aligned} & \left| \log\left(1 + \frac{\lambda_\ell}{\Lambda_j}\right) - \log\left(1 + \frac{\lambda'_\ell}{\Lambda'_j}\right) \right| \\ & \leq |\log(1 + \alpha_j) - \log(1 + e^{-\delta} \alpha_j)| \leq |1 - e^{-\delta}| |\alpha_j|. \end{aligned}$$

Furthermore, because  $\Lambda_j \geq (m-j+1)e^{-C}$  then  $|\alpha_j| \leq (m-j+1)^{-1}e^{2C}$  and

$$\begin{aligned} |L_{x,x'}(\pi) - L_{x,x'}(\pi')| &\leq 2\delta \\ &+ \sum_{j=\ell}^{\ell'-1} |1 - e^{-\delta}| \frac{e^{2C}}{m-j+1} \\ &\leq 2\delta + |1 - e^{-\delta}| e^{2C} H_m \\ &\leq \delta(2 + e^{2C} \ln(m+1)). \end{aligned}$$

In the above equation,  $H_m$  is the  $m$ th harmonic number. A similar calculation can be made when  $\ell' > \ell$ . Setting  $\delta = \|\log \phi(x) - \log \phi(x')\|_\infty$  concludes the proof.  $\square$

*Proof of Theorem 2.* Define the empirical process function to be

$$\rho_n(x) := \frac{1}{n} \sum_{i=1}^n \left( \log \frac{P_{X_i^*}(\Pi_i)}{P_{X_i}(\Pi_i)} - \mathbb{E} \log \frac{P_{X_i^*}(\Pi_i)}{P_{X_i}(\Pi_i)} \right).$$

By the listwise representation theorem,  $\rho_n(x)$  is a function of  $n \times m$  independent exponential random variables. Moreover, if we were to change the value of a single element  $y_{ik}$  then this would result in a change of permutation of the type described in Lemma 2. Notice that the bound on the change in the relative loss is  $C_0 \|\log \phi(X_i) - \log \phi(X'_i)\|_\infty$ , where  $C_0 = 2 + e^{2C} \ln(m+1)$ , and notice that the sum of squares of these bounds are,

$$\begin{aligned} &\sum_{i,k} C_0^2 \|\log \phi(X_i) - \log \phi(X'_i)\|_\infty^2 \\ &= mC_0^2 \sum_{i=1}^n \|\log \phi(X_i) - \log \phi(X'_i)\|_\infty^2 \\ &= mC_0^2 \|Z - Z'\|_{\infty,2}^2, \end{aligned}$$

where  $Z, Z'$  are  $\log \phi$  applied elementwise to  $X, X'$  respectively. By Lemma 2 and McDiarmid's inequality,

$$\mathbb{P}\{n(\rho_n(x) - \rho_n(x')) > \epsilon\} \leq \exp\left(-\frac{2\epsilon^2}{mC_0^2 \|Z - Z'\|_{\infty,2}^2}\right).$$

Hence, the stochastic process  $\{n\rho_n(X) : X \in \mathcal{X}\}$  is a subGaussian field with canonical distance,

$$d(X, X') := \sqrt{m}C_0 \|Z - Z'\|_{\infty,2}.$$

The result follows by Dudley's chaining (Talagrand, 2006).  $\square$

**Lemma 3.** *If  $\log \phi$  is 1-Lipschitz then we have that  $g(\mathcal{Z}) \leq g(\mathcal{X})$ .*

*Proof.* Let  $X, X' \in \mathcal{X}$ , and  $Z = \log \phi(X), Z' = \log \phi(X')$ . Then

$$|z_{ij} - z'_{ij}| \leq |x_{ij} - x'_{ij}|,$$

by the Lipschitz property. Hence,  $\|Z - Z'\|_{\infty,2} \leq \|X - X'\|_{\infty,2}$ , and so

$$\mathcal{N}(u, \mathcal{Z}, \|\cdot\|_{\infty,2}) \leq \mathcal{N}(u, \mathcal{X}, \|\cdot\|_{\infty,2}). \quad \square$$

*Proof of Corollary 1.* Consider two matrices  $X, X'$  in the model (7) then

$$\|x_i - x'_i\|_\infty = \max_j |\beta^\top z_{ij} - \beta'^\top z_{ij}| \leq \|\beta - \beta'\|_2 \|Z_i\|_{2,\infty}.$$

Let  $\zeta = \max_i \|Z_i\|_{2,\infty}$  then

$$\|X - X'\|_{\infty,2} \leq \zeta \|\beta - \beta'\|_2.$$

The covering number of  $\mathcal{X}$  is therefore bounded by

$$\mathcal{N}(\mathcal{X}, u, \|\cdot\|_{\infty,2}) \leq \mathcal{N}(B_{c_b}, u/\zeta, \|\cdot\|_2) \leq \left(\frac{\zeta C_0 c_b}{u}\right)^s,$$

for an absolute constant  $C_0$ , where  $B_{c_b}$  is the  $\ell_2$  ball of radius  $c_b$ . The result follows by Lemma 3 and Theorem 2.  $\square$

*Proof of Corollary 2.* Let  $X = UV^\top$  and  $X' = U'V'^\top$  such that  $U, V, U', V'$  bounded by 1 in Frobenius norm (modifying the Frobenius norm bound does not change the substance of the proof). Consider

$$\begin{aligned} |u_i^\top v_j - u_i'^\top v_j'| &\leq |u_i^\top v_j - u_i'^\top v_j| + |u_i'^\top v_j - u_i'^\top v_j'| \\ &\leq \|u_i - u_i'\| \|v_j\| + \|u_i'\| \|v_j - v_j'\|. \end{aligned}$$

Maximizing this over the selection of  $j$ ,

$$\begin{aligned} &\max_j |u_i^\top v_j - u_i'^\top v_j'| \\ &\leq \|u_i - u_i'\|_2 \|V\|_{2,\infty} + \|u_i'\|_2 \|V - V'\|_{2,\infty}. \end{aligned}$$

Hence,

$$\begin{aligned} \|X - X'\|_{\infty,2} &\leq \|U - U'\|_F \|V\|_{2,\infty} + \|U'\|_F \|V - V'\|_{2,\infty} \\ &\leq \|U - U'\|_F + \|V - V'\|_{2,\infty}. \end{aligned}$$

Consider the vectorization mapping from the  $m \times r$  matrix to the  $mr$  dimensional vectors. The Frobenius norm is mapped to the  $\ell_2$  norm, and we can consider the  $2, \infty$  norm to be, the norm  $\|x\|_\rho = \max_j \|(x_{jr+1}, \dots, x_{j(r+1)})\|_2$ . The  $\rho$ -norm unit ball ( $B_\rho$ ) is just the Cartesian product of the  $\ell_2$  norm ball in  $K$  dimensions. The volume of a  $d$ -dimensional ball,  $V_d$ , is bounded by

$$C_l \leq \frac{V_d}{(e\pi)^{d/2}} d^{\frac{d}{2}} \leq C_u,$$

where  $C_l < C_u$  are universal constants. So the volume ratio between the  $\ell_2$  norm ball and the  $\rho$  norm ball is bounded by

$$\begin{aligned} \frac{V(B_2)}{V(B_\rho)} &\leq C \left( \frac{r^{r/2}}{(e\pi)^{r/2}} \right)^m / \left( \frac{(rm)^{rm/2}}{(e\pi)^{rm/2}} \right) \\ &\leq C m^{-rm/2}, \end{aligned}$$

where  $C = C_u/C_l$ .

$$\begin{aligned} \mathcal{N}(\epsilon, B_2, \|\cdot\|_\rho) &\leq C_r \left( \frac{2}{\epsilon} + 1 \right)^{rm} m^{-rm/2} \\ &\leq C \left( \frac{3}{\epsilon\sqrt{m}} \right)^{rm}, \end{aligned}$$

for  $\epsilon \leq 1$ . This is also the covering number of the Frobenius norm ball in the  $2, \infty$  norm. Moreover, we know that the covering number of the unit Frobenius norm ball in  $n \times K$  matrices ( $B_F$ ) in the Frobenius norm is

$$\mathcal{N}(\epsilon, B_F, \|\cdot\|_F) \leq \left( \frac{c}{\epsilon} \right)^{nr},$$

for some constant  $c$ . Consider covering the space  $\mathcal{X}$ , by selecting centers  $U, V$  from the  $\epsilon/2$ -coverings of  $B_F$  in the  $F$ -norm and  $2, \infty$  norm respectively. By the above norm bound, this produces an  $\epsilon$ -covering in the  $\infty, 2$  norm. Dudley's entropy bound is thus

$$\begin{aligned} &\int_0^\infty \sqrt{\log \mathcal{N}(\epsilon, B_F, \|\cdot\|_F) + \log \mathcal{N}(\epsilon, B_F, \|\cdot\|_{2,\infty})} d\epsilon \\ &\leq \int_0^c \sqrt{nr \log(c/\epsilon)} d\epsilon + \int_0^{3/\sqrt{m}} \sqrt{-mr \log(\epsilon\sqrt{m}/3)} d\epsilon. \end{aligned}$$

So that

$$\begin{aligned} &\int_0^c \sqrt{nr \log(c/\epsilon)} d\epsilon \\ &\leq c' \sqrt{nr} \end{aligned}$$

for some absolute constant  $c'$  and

$$\begin{aligned} &\int_0^{3/\sqrt{m}} \sqrt{-mr \log(\epsilon\sqrt{m}/3)} d\epsilon \leq \int_0^3 \sqrt{r \log(u/3)} du \\ &\leq c' \sqrt{r}. \end{aligned}$$

Hence, for  $g(\mathcal{X}) \leq c' \sqrt{nr}$  and we have the result.  $\square$

## A.2. Algorithms

**Algorithm 3** Compute gradient for  $V$  when  $U$  fixed

**Input:**  $\Pi, U, V, \lambda, \rho$

**Output:**  $g \{g \in \mathbb{R}^{r \times m}$  is the gradient for  $f(V)\}$

$g = \lambda \cdot V$

**for**  $i = 1$  **to**  $n$  **do**

Precompute  $h_t = u_i^T v_{\Pi_{it}}$  for  $1 \leq t \leq \bar{m}$  {For implicit feedback, it should be  $(1 + \rho) \cdot \bar{m}$  instead of  $\bar{m}$ , since  $\rho \cdot \bar{m}$  0's are appended to the back}

Initialize  $total = 0, tt = 0$

**for**  $t = \bar{m}$  **to** 1 **do**

$total += \exp(h_t)$

$tt += 1/total$

**end for**

Initialize  $c[t] = 0$  for  $1 \leq t \leq \bar{m}$

**for**  $t = \bar{m}$  **to** 1 **do**

$c[t] += h_t \cdot (1 - h_t)$

$c[t] += \exp(h_t) \cdot h_t \cdot (1 - h_t) \cdot tt$

$total += \exp(h_t)$

$tt -= 1/total$

**end for**

**for**  $t = 1$  **to**  $\bar{m}$  **do**

$g[:, \Pi_{it}] += c[t] \cdot u_i$

**end for**

**end for**

**Return**  $g$

**Algorithm 4** Gradient update for  $V$  (Same procedure for updating  $U$ )

**Input:**  $V, ss, rate$  { $rate$  refers to the decaying rate of the step size  $ss$ }

**Output:**  $V$

Compute gradient  $g$  for  $V$  {see alg 3}

$V -= ss \cdot g$

$ss *= rate$

**Return**  $V$

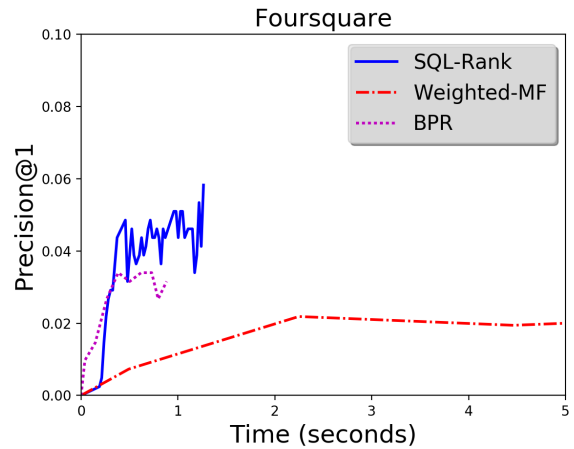

Figure 3. Comparing implicit feedback methods.

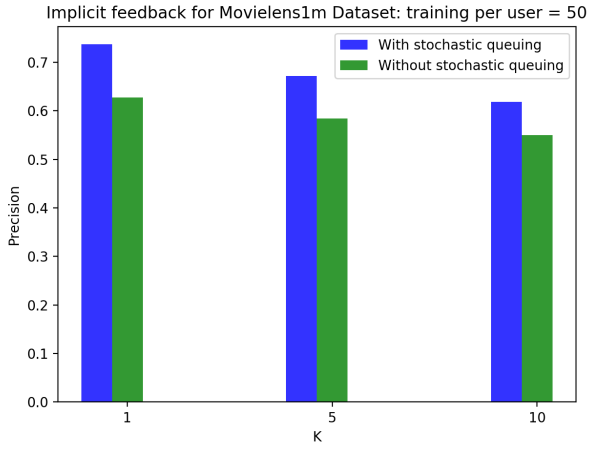

Figure 4. Effectiveness of Stochastic Queuing Process.

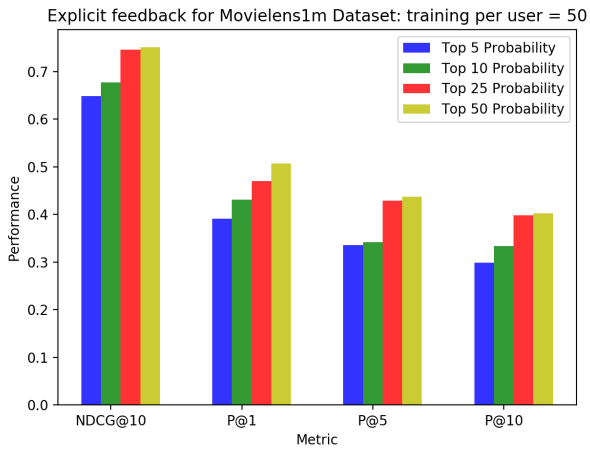

Figure 5. Effectiveness of using full lists.
